# Supplementary material
Source: publisher figshare collection journal article supplement (https://gsapubs.figshare.com/ndownloader/files/25999325)
Supplement: Supplementary file 1 [file 25999325]

## Sheet: Table S1_Abbreviations & rec
		Table S1: RAW DATA. Categories used for sandstone point-counts and assigned grains in recalculated plots are those of Dickinson (1985) and Marsaglia (1991)
		Abbreviation	Grain type	Recalculated parameters
		Qmr	Monocrystalline quartz, undulosity <5°	Qt= Qmr+Qmo+Qp2-3+Qp>3+QrMet+QrPut+Crq
		Qmo	Monocrystalline quartz, undulosity >5°	F= Fs+FrPlugr+KrF+CrF+Ps+PrPluGra+SrP+CrP
		Qp2-3	Polycrystalline quartz 2-3 subgrains	L=Ch+LsAr+LsLu+LvRiol+LvFel+LvLat+LvMic+LvTobS+LvTobNs+Lmp1+Lmp2+Lmp3+Lms1+Lms2+Lmc2+Lmc3+LpMq+LpGf+LpFa
		Qp>3	Polycrystalline quartz > 3 subgrains	CE= LsCm+LsCs+LsCDol
		QrMet	Quartz in metamorphic fragment
		QrPlut	Quartz in plutonic fragment	Lm= Lmp1+Lmp2+Lmp3+Lms1+Lms2+Lmc2+Lmc3
		Crq	Quartz cover by calcite cement	Lv= LvRiol+LvFel+LvLat+LvMic+LvTobS+LvTobNs+LvTobEs
		Fs	Alkali feldspar single crystal	Ls= Ch+LsAr+LsLu+LsCm+LsCs+LsCDol
		FrPluGr	Feldspar in plutonic fragment
		KrF	kaolinite remplacement alkali feldspar	Lvf= LvFel
		CrF	calcite cement remplacement alkali feldspar	Lvl= LvLat
		Ps	Plagioclase single crystal	Lvm= LvMic
		PrPluGra	Plagioclase in plutonic fragment
		SrP	Sericite remplacement plagioclase	QtFL+CE%Q = 100 X Q/(Qt+F+(L+CE))
		CrP	Calcite cement remplacement plagioclase	QtFL+CE%F = 100 X F/(Qt+F+(L+CE))
		Ch	Chert	QtFL+CE%L+CE = 100 X L+CE/(Qt+F+(L+CE))
		LsAr	Fine-grained Sandstone fragment
		LsLu	Shale clast	LmLvLs%Lm = 100 X Lm/(Lm+Lv+Ls)
		LsCm	Micritic carbonate fragment	LmLvLs%Lv = 100 X Lv/(Lm+Lv+Ls)
		LsCs	Sparite carbonate fragment	LmLvLs%Ls = 100 X Ls/(Lm+Lv+Ls)
		LsCDol	Dolomitic carbomate fragment
		LvRiol	Rhyolitic volcanic grain	LvfLvlLvm%Lvf = 100 X Lvf/(Lvf+Lvl+Lvm)
		LvFel	Felsitic volcanic grain	LvfLvlLvm%Lvl = 100 X Lvl/(Lvf+Lvl+Lvm)
		LvLat	Lathwork volcanic grain	LvfLvlLvm%Lvm = 100 X Lvm/(Lvf+Lvl+Lvm)
		LvMic	Microlithic volcanic grain
		LvTobS	Spherulthic Tuffaceous fragment
		LvTobNs	Non-Spherulitic tuffaceous fragment
		LvTobEs	Spherulthic Tuffaceous fragment
		Lmp1	Metapellite lithic fragment grade 1
		Lmp2	Metapellite lithic fragment grade 2
		Lmp3	Metapellite lithic fragment grade 3
		Lms1	Metapsammite lithic fragment grade 1
		Lms2	Metapsammite lithic fragment grade 2
		Lmc2	Metacarbonatic lithic fragment grade 2
		Lmc3	Metacarbonatic lithic fragment grade 3
		LpMq	Myrmekite plutonic fragment
		LpGf	Graphic plutonic fragment
		LpFa	Phaneritic plutonic fragment
		Biotite	Biotite
		Muscovite	Muscovite
		Clorite	Clorite
		Amf	Amphibole
		Sericite	Sericite
		Zircon	Zircon
		Epidote	Epidote
		Rutile	Rutile
		C-Px	C-Px
		O-Px	O-Px
		Apatite	Apatite
		Jarosite	Jarosite
		Glauconite	Glauconite
		Hematite	Hematite
		Opaque	Opaque
		Matrix	Matrix
		Fe-Matrix	Fe-Matrix
		Epi-Matrix	Epi-Matrix
		Proto-Matrix	Proto-Matrix
		Orto-Matrix	Orto-Matrix
		Sparite Cement	Sparite Cement
		Sparite Cement	Sparite Cement
		Dolomitized Cement	Dolomitized Cement
		CemAnk	Ankeretized cement

## Sheet: Table S1_Point counting
Supplemental Material for Ocampo-Díaz, Y.Z.E., Torres-Sánchez, S.A., Augustsson, C., Macías, J.L., Sosa-Ceballos, G., Cisneros-Máximo, G., García-Sánchez, L.,
Osorio-Ocampo, S., Avellan, D.R., Omma, J., Ortega-Obregón, C., Solari, L.A., and González-Barba, G., 2020, Provenance of the El Salto Formation (early Oligocene
to early Miocene), southern part of La Reforma caldera, Baja California Sur, Mexico, in Martens, U.C., and Molina Garza, R.S., eds., Southern and Central Mexico:
Basement Framework, Tectonic Evolution, and Provenance of Mesozoic–Cenozoic Basins: GSA Special Paper 546, p. 1–32, https://doi. org/10.1130/2020.2546(11).
		Table S1: RAW DATA. CATEGORIES USED FOR SANDSTONE POINT-COUNTS AND ASSIGNED GRAINS IN RECALCULATED PLOTS ARE THOSE OF DICKINSON (1985) AND MARSAGLIA (1991)
	Sample	Yaq-42	Yaq-43	Yaq-45	Yaq-50	Yaq-52	Yaq-54	Yaq-53	Yaq-57	Yaq-58	Yaq-58a	Yaq-59	Yaq-61	Yaq-63	Yaq-01-17	Yaq-04-17	Yaq-06-17	Yaq-08-18	Yaq-09-17	Yaq-12-17	Yaq-13-17	Yaq-56	Yaq-60	Yaq-62	Yaq-64	Yaq-65
		Petrofacies A	Petrofacies A	Petrofacies A	Petrofacies A	Petrofacies A	Petrofacies A	Petrofacies B	Petrofacies B	Petrofacies B	Petrofacies B	Petrofacies B	Petrofacies B	Petrofacies B	Petrofacies B	Petrofacies B	Petrofacies B	Petrofacies B	Petrofacies B	Petrofacies B	Petrofacies B	Petrofacies C	Petrofacies C	Petrofacies C	Petrofacies C	Petrofacies C
	Qmr	22	20	33	4	4	8	7	8	12	18	11	16	6	8	16	6	14	7	14	12	10	4	15	13	8
	Qmo	295	341	309	284	297	282	278	326	336	314	339	246	296	330	317	300	319	275	352	327	219	48	263	215	115
	Qp2-3	45	28	20	36	28	10	15	16	24	40	16	21	33	40	13	10	31	18	14	30	14	7	23	14	16
	Qp>3	22	4	12	8	4	2	3	6	6	8	6	4	10	16	8	4	8	5	11	18	8	6	6	4	6
	QrMet	0	0	2	4	0	0	0	2	0	0	0	0	0	0	0	0	0	0	0	0	0	0	0	0	0
	QrPlut	6	4	0	0	0	0	4	4	8	4	4	0	0	4	0	4	4	0	2	12	0	2	4	12	17
	Crq	0	0	0	0	0	0	0	0	0	0	0	0	0	0	0	0	0	0	3	0	0	0	2	0	0
	Fs	86	74	76	115	65	80	101	100	98	126	122	61	102	100	66	87	69	43	84	85	117	40	126	223	102
	FrPluGr	6	4	2	4	2	2	2	3	4	4	6	4	4	14	10	10	2	4	10	27	7	0	2	34	27
	KrF	13	16	8	16	6	8	8	10	30	13	10	4	6	14	24	16	20	10	8	20	16	0	7	6	10
	CrF	4	0	6	0	2	0	0	0	0	4	2	0	0	2	2	0	0	3	4	0	6	0	6	2	2
	Ps	28	32	23	52	17	32	59	71	81	88	93	52	74	63	54	54	53	27	49	66	67	30	97	169	86
	PrPluGra	2	0	0	2	0	0	0	2	2	7	1	0	2	2	4	6	0	0	4	13	0	0	6	30	33
	SrP	8	8	5	4	0	6	0	6	13	13	8	0	0	0	3	8	13	3	4	10	6	0	11	4	2
	CrP	0	0	0	0	0	0	0	0	0	3	0	0	0	0	0	0	0	0	0	0	4	0	0	0	0
	Ch	24	10	16	12	10	11	12	8	17	14	16	10	4	17	13	20	15	18	19	12	2	7	19	7	11
	LsAr	4	0	2	0	0	0	4	4	4	2	5	0	4	2	6	2	2	2	0	16	2	2	2	0	6
	LsLu	10	2	3	2	2	2	9	16	9	7	10	2	8	3	16	4	33	9	9	25	8	4	11	7	12
	LsCm	4	8	14	14	2	0	14	2	0	0	0	0	3	100	10	16	8	16	29	10	6	0	8	4	2
	LsCs	2	0	6	6	2	2	11	5	2	4	0	0	4	24	14	4	3	8	21	5	3	0	0	2	2
	LsCDol	9	4	4	0	0	0	2	0	0	0	0	0	0	7	12	2	0	2	0	2	2	0	0	0	0
	LvRiol	0	0	0	0	0	2	2	0	0	2	0	0	0	0	0	0	0	0	0	0	0	0	0	0	0
	LvFel	127	99	117	101	87	102	112	178	194	186	192	131	178	231	235	234	259	242	202	246	186	45	191	168	117
	LvLat	0	0	0	0	0	2	22	56	52	62	78	48	53	17	22	8	7	9	6	21	107	162	64	160	174
	LvMic	2	2	0	0	0	2	41	48	40	55	53	21	44	12	12	4	6	2	7	14	87	182	83	134	109
	LvTobS	6	2	0	2	0	0	0	8	6	4	4	2	0	3	0	2	2	0	0	4	2	2	2	2	0
	LvTobNs	26	24	10	4	4	18	24	35	50	92	113	49	53	60	90	70	53	52	36	136	55	59	74	0	73
	LvTobEs	2	0	2	0	0	0	6	2	0	4	4	2	0	0	2	0	2	0	2	7	10	2	2	2	3
	Lmp1	0	0	0	0	0	2	0	0	0	2	0	0	0	2	2	0	0	0	0	0	0	0	0	0	0
	Lmp2	0	2	0	0	0	0	6	0	4	4	0	0	0	0	3	4	0	0	0	0	0	0	0	0	0
	Lmp3	2	0	0	0	0	0	0	0	4	2	0	0	0	0	0	0	0	0	0	0	2	0	0	0	0
	Lms1	2	2	4	0	2	2	2	2	2	2	0	0	2	4	6	4	0	0	0	8	2	0	0	0	0
	Lms2	2	2	4	0	2	0	4	0	2	2	2	0	4	4	6	12	0	0	0	14	0	0	0	0	0
	Lmb2	2	0	0	0	0	0	2	0	2	0	0	0	0	0	0	0	0	0	0	0	0	0	2	0	0
	Lmc2	0	0	0	0	0	0	0	0	0	0	0	0	0	0	0	0	0	0	0	0	5	0	0	0	0
	Lmc3	0	0	0	0	0	0	0	0	0	0	0	0	0	0	0	0	0	0	0	0	2	0	0	0	0
	LpMq	4	2	0	0	0	0	0	0	0	0	0	0	0	2	0	0	0	0	0	0	0	0	0	0	0
	LpGf	4	2	0	0	0	0	0	0	0	0	0	0	0	0	0	2	0	0	0	3	0	2	0	0	0
	LpFa	2	0	0	0	0	0	0	0	0	0	0	0	0	0	0	2	0	0	7	7	3	2	0	9	0
	Biotita	0	2	0	2	0	0	0	0	0	2	0	0	0	0	0	0	0	0	0	0	0	0	0	0	2
	Muscovita	2	0	0	0	0	3	2	3	6	2	6	4	4	2	1	2	0	0	0	2	2	2	0	2	2
	Clorita	2	2	2	0	0	0	2	0	3	2	0	2	3	1	3	2	2	0	3	3	0	0	2	3	0
	Sericita	0	0	0	2	0	0	8	2	6	6	12	6	8	3	8	4	2	0	2	7	2	2	7	8	2
	Circon	2	3	2	2	2	3	2	2	3	4	3	2	2	4	3	2	2	0	4	1	4	3	5	3	2
	Epidota	0	0	0	0	2	3	2	3	3	6	8	7	6	2	4	3	3	0	2	6	2	0	3	8	6
	Rutilo	0	0	0	0	0	0	0	0	0	0	3	0	0	2	0	0	0	0	0	1	0	0	3	1	0
	C-Px	0	0	2	0	0	0	2	2	2	8	8	0	0	6	0	0	0	0	2	3	7	13	6	2	6
	O-Px	0	0	0	0	0	0	0	0	2	0	0	0	0	0	0	0	0	0	0	0	2	7	2	0	0
	Amf	0	0	0	0	0	0	2	0	0	3	0	0	0	0	0	0	0	0	0	0	2	0	0	0	2
	Apatito	0	0	0	0	0	0	0	3	0	2	2	0	0	0	2	0	2	0	0	0	0	0	0	0	0
	Jarosita	2	0	0	0	0	0	4	0	0	3	4	0	0	0	2	0	2	0	3	2	0	4	3	0	0
	Glauconita	2	0	0	0	0	0	0	0	2	0	0	0	0	0	0	0	0	0	0	0	0	0	0	0	0
	Hematita	0	1	2	5	0	15	6	12	8	8	6	9	6	10	12	11	13	11	13	13	6	4	7	6	16
	Opacos	0	2	7	6	0	9	15	13	4	13	9	2	6	6	14	9	12	14	8	18	10	5	3	12	9
	Matriz	0	0	0	3	0	2	0	0	0	0	0	0	2	0	0	0	0	0	0	0	0	0	0	0	0
	Fe-Matriz	12	6	13	3	11	3	24	38	13	30	18	8	16	19	50	24	22	17	44	41	45	0	26	13	24
	Epi-Matriz	16	6	13	8	2	38	4	24	30	38	18	18	23	40	24	11	33	23	23	28	13	32	38	49	38
	Proto-Matriz	8	13	0	3	0	0	0	0	0	0	0	0	0	0	0	0	0	0	0	0	0	12	0	2	0
	Orto-Matriz	0	0	0	0	0	0	3	0	0	3	0	0	0	0	0	0	0	0	0	0	0	0	0	0	0
	CemCalEsParc	0	0	6	47	28	0	0	3	0	8	10	28	0	8	16	0	0	34	52	3	32	0	16	6	3
	CemCalEsPoiki	72	0	16	10	7	0	23	3	0	0	18	6	7	83	30	0	0	22	26	6	8	0	32	8	7
	CemDol	7	0	0	0	0	0	0	0	0	0	0	0	0	0	2	0	0	0	0	0	0	0	0	0	0
	CemAnk	8	0	4	4	0	0	5	0	0	0	0	0	0	0	8	0	0	0	6	15	0	0	0	0	0
	CemCuarzo	0	0	0	0	0	0	0	0	0	0	0	0	0	0	0	0	0	0	0	0	0	0	0	0	0
	CemMicas	0	0	0	0	0	0	0	0	0	0	0	0	0	0	0	0	0	0	0	0	0	0	0	0	0
	Total	904	727	745	765	588	651	854	1026	1084	1224	1220	765	973	1267	1145	963	1016	876	1085	1299	1093	690	1179	1344	1052
	Gazzi-Dickisnon	­	­	­	­	­	­	­	­	­	­	­	­	­	­	­	­	­	­	­	­	­	­	­	­	­
	Qt%	50.5837	57.3699	55.4572	50.1493	62.1269	52.5217	40.9333	39.4336	38.523	35.3591	34.3379	42.6449	38.764	36.8178	36.646	36.2011	40.7367	40.3974	44.1472	34.6957	26.2004	11.0561	30.5068	21.1302	17.3633
	F%	19.0661	19.3642	17.6991	28.806	17.1642	22.2609	22.6667	20.915	22.7545	23.7569	22.1005	17.9792	21.1236	18.0389	16.8737	20.2235	17.0098	11.9205	18.1717	19.2174	23.2777	11.5512	24.8538	38.3292	28.0815
	L+CE%	30.3502	23.2659	26.8437	21.0448	20.709	25.2174	36.4	39.6514	38.7226	40.884	43.5616	39.3759	40.1124	45.1434	46.4803	43.5754	42.2535	47.6821	37.6812	46.087	50.5219	77.3927	44.6394	40.5405	54.5552
	Qm%	45.8807	55.303	53.2508	46.6454	59.7222	51.5098	39.4809	37.9464	36.6255	32.3699	32.9916	40.4321	35.6553	33.3659	35.2381	35.1873	38.1222	38.5246	42.5459	31.8512	24.4658	9.10624	28.4855	19.9501	15.3677
	F%	20.8807	20.303	18.5759	30.8307	18.254	22.7353	23.224	21.4286	23.4568	24.8555	22.5536	18.6728	22.196	19.0244	17.2487	20.5448	17.7602	12.2951	18.6927	20.0544	23.8248	11.8044	25.5767	38.9027	28.7596
	Lt%	33.2386	24.3939	28.1734	22.524	22.0238	25.7549	37.2951	40.625	39.9177	42.7746	44.4548	40.8951	42.1488	47.6098	47.5132	44.2679	44.1176	49.1803	38.7615	48.0944	51.7094	79.0894	45.9378	41.1471	55.8727
	Qm%	68.7234	73.1463	74.1379	60.2062	76.5903	69.378	62.963	63.9098	60.9589	56.5657	59.396	68.4073	61.6327	63.6872	67.1371	63.1365	68.2186	75.8065	69.4757	61.3636	50.6637	43.5484	52.6902	33.8983	34.8259
	K%	23.1915	18.8377	19.8276	27.8351	19.084	21.5311	24.183	21.2406	22.6027	24.7475	23.4899	18.0157	22.8571	24.2086	20.5645	23.0143	18.4211	16.129	19.8502	23.0769	32.3009	32.2581	26.1596	37.4294	35.0746
	P%	8.08511	8.01603	6.03448	11.9588	4.3257	9.09091	12.854	14.8496	16.4384	18.6869	17.1141	13.577	15.5102	12.1043	12.2984	13.8493	13.3603	8.06452	10.6742	15.5594	17.0354	24.1935	21.1503	28.6723	30.0995
	Lm%	3.4188	3.72671	4.3956	0	3.6036	2.75862	5.12821	0.549451	3.60825	2.7027	0.419287	0	1.68067	2.04918	3.78619	5.12821	0	0	0	4.15094	2.27273	0	0.436681	0	0
	Lv%	73.9316	81.3665	70.8791	75.8865	81.982	86.8966	75.8242	89.8352	88.1443	91.2162	93.0818	95.4717	91.8768	66.5984	80.4009	82.5641	84.359	84.7222	76.9231	82.6415	92.9752	97.2281	90.8297	95.9596	93.5167
	Ls%	22.6496	14.9068	24.7253	24.1135	14.4144	10.3448	19.0476	9.61538	8.24742	6.08108	6.49895	4.5283	6.44258	31.3525	15.8129	12.3077	15.641	15.2778	23.0769	13.2075	4.75207	2.77185	8.73362	4.0404	6.4833
	Qp/Qm	0.21	0.0876712	0.0930233	0.150685	0.106312	0.0413793	0.0622837	0.0647059	0.0842697	0.142857	0.0621469	0.0954198	0.142384	0.163743	0.0630631	0.0451613	0.115727	0.0815603	0.0673854	0.136752	0.0960699	0.240741	0.102113	0.075	0.157143
	P/F	0.33	0.432432	0.302632	0.452174	0.261538	0.4	0.584158	0.71	0.826531	0.698413	0.762295	0.852459	0.72549	0.63	0.818182	0.62069	0.768116	0.627907	0.583333	0.776471	0.57265	0.75	0.769841	0.757848	0.843137
	Lv/Lt	5.9	7.50844	6.45048	6.64627	7.47319	7.67519	6.65903	8.03788	8.14766	8.0932	8.35447	8.39901	8.40394	5.64718	6.78317	7.57808	7.66371	7.30197	6.18823	7.14919	8.09483	8.46426	7.90426	8.55258	8.29383
	Lm/Lt	0.05	0.0472441	0.0620155	0	0.043956	0.031746	0.0676329	0.00611621	0.0409357	0.0296296	0.0045045	0	0.0182927	0.0309598	0.0470914	0.0628931	0	0	0	0.0514019	0.0246085	0	0.00480769	0	0
	HV	8.85	9.62861	8.05369	7.84314	6.80272	13.8249	28.103	14.6199	23.0627	31.0458	37.7049	27.451	23.6382	15.7853	20.0873	13.4995	12.7953	0	14.7465	19.2456	19.2132	44.9275	26.2935	20.0893	20.9125
	­ unmeasured
